# Supplementary material for: Mechanics of CRISPR-Cas12a and engineered variants on λ-DNA
Source: PubMed Central journal article supplement — Nucleic Acids Res. 2021 Dec 24;50(9):5208–25. doi: 10.1093/nar/gkab1272 (PMC9122593; doi:10.1093/nar/gkab1272), 2021-12-24

# Supplementary Material

## Mechanics of CRISPR-Cas12a and engineered variants on $\lambda$ -DNA

Bijoya Paul<sup>1</sup>, Loïc Chaubet<sup>2</sup>, Dideke Emma Verver<sup>2</sup> & Guillermo Montoya<sup>1\*</sup>

<sup>1</sup>Structural Molecular Biology Group, Novo Nordisk Foundation Centre for Protein Research, Faculty of Health and Medical Sciences University of Copenhagen, Blegdamsvej 3-B, Copenhagen, 2200, Denmark.

<sup>2</sup>LUMICKS, Pilotenstraat 41, 1059 CH, Amsterdam, The Netherlands.

\*To whom correspondence should be addressed Email: [guillermo.montoya@cpr.ku.dk](mailto:guillermo.montoya@cpr.ku.dk)

## Supplementary Figure Legends

**Supplementary Fig. 1.- Cleavage assays on different  $\lambda$ -DNA target sites.** Five different sites were selected on the  $\lambda$ -DNA and the cleavage activity of the endonuclease was tested with the corresponding crRNAs. The site targeted by crRNA1 on  $\lambda$ -DNA displayed the best activity and it was selected for further analysis (Supplementary Table 1).

**Supplementary Fig. 2.- Controls for single molecule experiments, mapping of binding profiles to A-T density along  $\lambda$ -DNA and mapping of binding profile to base pairs along  $\lambda$ -DNA.** **a)** 3 kymographs of a single DNA tether which was exposed to 2nM crRNA-1-Cy5/Cas12a (top), then 2nM crRNA-1-Cy5 crRNA only (middle) and finally back into 2nM crRNA-1-Cy5/Cas12a (bottom), all at 50 pN. The binding observed in the top and bottom kymographs is specific to Cas12, as the labelled crRNA alone does not yield any binding. **b)** Representative kymograph illustrating the bead center, which is marked by a dot in the blue channel. This reference was used for localization. **c)** An intensity profile was generated along the entire length of the scanned  $\lambda$ -DNA.

**Supplementary Fig. 3.- Sequence analysis for predicted binding locations.** **a)** Binding profile of Cas12a showing sequence matches without any PAM considerations on NT-strand ( $5' \rightarrow 3'$ , green lines) and on T-strand ( $5' \rightarrow 3'$ , grey lines). **b)** Binding profile of Cas12a showing sequence matches TTN-PAM on NT-strand ( $5' \rightarrow 3'$ , green lines) and on T-strand ( $5' \rightarrow 3'$ , grey lines). **c)** Scheme showing example search for a sequence match along  $\lambda$ -DNA.

**Supplementary Fig. 4.- Bulk activity of Cas12a variants with crRNA-1 and binding of Cas12a variants to  $\lambda$ -DNA.** **a)** Left panel displays 15% urea gel showing enzymatic activity of Cas12a variants with crRNA-6 (See Supplementary Table 1) with the annealed dsDNA formed by TS-6-long and NTS-6-long (See Supplementary table 1 and Materials and Methods). Right panel displays 15% urea gel showing indiscriminate ssDNA activity of Cas12a variants using crRNA-1 and activated by  $\lambda$ -activator (See Supplementary Table 1), with Unspecific ssDNA (See Supplementary Table 1) as the substrate. **b)** The top panel shows representative 120s kymographs of Cas12a variants with increasing forces ( $n=5$ ). The bottom panel shows the binding profiles of Cas12a variants at increasing forces binned at 120s ( $n=5$ ). **c)** Binding profiles of wtCas12a and its variants binned at 120s plotted alongside A-T density profile of the  $\lambda$ -DNA. **d)** Top panel in green shows Cas12a\_M3 binding to  $\lambda$ -DNA with gradual ramp up in force from 0 to 60 pN. The  $\lambda$ -DNA was co-stained with Sytox orange as a dsDNA marker, and the middle panel in red shows the signal obtained from staining with Sytox orange. Bottom panel shows superimposition of signals from labelled Cas12a-crRNA-1 complex and Sytox orange. The force applied on the  $\lambda$ -DNA vs time is denoted below the figure, as is the distance between the beads vs time (which results in the force applied on the DNA tether).

**Supplementary Fig. 5.- Kinetics of Cas12a\_M2 cleavage on T-strand and NT-strand.** **a)** 15% urea gel showing the time-course cleavage assay of the T-strand and NT-strand ( $n=3$ ). **b)** Quantification and apparent rates of product formation of the T-strand (grey) and NT-strand (green). The experiment was repeated 3 times. The error bars show the SD of each measurement.

**Supplementary Table 1: DNA sequences and oligos**

| No | Name                   | Sequence                                                                                   |
|----|------------------------|--------------------------------------------------------------------------------------------|
| 1  | 3'-Cy5-labeled crRNA-1 | rArArUrUrUrCrUrArCrUrGrUrUrGrUrArGrArUrUrGrUrArArArGrArArArCrArGrUrArArGrArUrArArU/3Cy5Sp/ |
| 2  | crRNA-1                | rArArUrUrUrCrUrArCrUrGrUrUrGrUrArGrArUrUrGrUrArArArGrArArArCrArGrUrArArGrArUrA             |
| 3  | crRNA-2                | rArArUrUrUrCrUrArCrUrGrUrUrGrUrArGrArUrUrGrUrCrGrCrGrGrGrUrArUrUrGrGrCrCrUrCrArGrCrArU     |
| 4  | crRNA-3                | rArArUrUrUrCrUrArCrUrGrUrUrGrUrArGrArUrUrUrGrArCrCrCrGrGrCrArArArCrGrGrGrArArUrGrArArA     |
| 5  | crRNA-4                | rArArUrUrUrCrUrArCrUrGrUrUrGrUrArGrArUrUrCrGrUrArCrArGrUrUrUrCrArGrCrUrArUrCrGrUrCrA       |
| 6  | crRNA-5                | rArArUrUrUrCrUrArCrUrGrUrUrGrUrArGrArUrUrCrArArUrUrUrGrUrUrGrCrArArCrGrArArCrA             |
| 7  | TS-1                   | ATCGGGTTGAGTATTATCTTACTGTTTCTTACATAAAC/36-FAM/                                             |
| 8  | NTS-1                  | /56-FAM/GTTTATGTAAAGAAACAGTAAGATAATACTCAACC CGAT                                           |
| 9  | TS-2                   | CGTGTCTCCATGCTGAGGCCAATACCCGCGACATAATG/36-FAM/                                             |
| 10 | NTS-2                  | /56-FAM/CATTATGTCGCGGGTATTGGCCTCAGCATGGAGGAC ACG                                           |
| 11 | TS-3                   | AAACATCGGCGTTTCATTCCCGTTTGCCGGGTCAATAAA/36-FAM/                                            |
| 12 | NTS-3                  | /56-FAM/TTTATTGACCCGGCAAACGGGAATGAAACGCCGAT GTTT                                           |
| 13 | TS-4                   | CTCAGTAATGTGACGATAGCTGAAAAGTGTACGATAAAC /36-FAM/                                           |
| 14 | NTS-4                  | /56-FAM/GTTTATCGTACAGTTTTTCAGCTATCGTCACATTACT GAG                                          |
| 15 | TS-5                   | GACTGATAGTGACCTGTTTCGTTGCAACAAATTGATAAGC/36-FAM/                                           |
| 16 | NTS-5                  | /56-FAM/GCTTATCAATTTGTTGCAACGAACAGGTCACTATCA GTC                                           |
| 17 | TS-1-long              | CGTACTCAAACATCGGGTTGAGTATTATCTTACTGTTTCT TTACATAAAC/36-FAM                                 |
| 18 | NTS-1-long             | /56-FAM/GTTTATGTAAAGAAACAGTAAGATAATACTCAACC CGATGTTTGAGTACG                                |
| 19 | $\lambda$ -activator   | CATCGGGTTGAGTATTATCTTACTGTTTCTTTACATAAAC                                                   |
| 20 | Unspecific ssDNA       | CGATGCATGACCAGTCTTTATCCCCAGGTCCTCCAAACT /36-FAM/                                           |
| 21 | crRNA-6                | rArArUrUrUrCrUrArCrUrGrUrUrGrUrArGrArUrGrArGrArGrUrCrArUrUrUrArArUrArArGrGrCrCrArCrU       |
| 22 | TS-6                   | CGATGCATGCAGTGGCCTTATTAAATGACTTCTCTAACG/36-FAM/                                            |
| 23 | NTS-6                  | /56-FAM/CGTTAGAGAAGTCATTTAATAAGGCCACTGCATGC ATCG                                           |
| 24 | Activator TS           | CGATGCATGCAGTGGCCTTATTAAATGACTTCTCTAACG                                                    |

|    |            |                                                                                                                                                                                                                                                                                                                                                                                              |
|----|------------|----------------------------------------------------------------------------------------------------------------------------------------------------------------------------------------------------------------------------------------------------------------------------------------------------------------------------------------------------------------------------------------------|
| 25 | Off target | TCCTGCTCCGGATCGGCGTAACTGTTTCCGTTGACGAAGT<br>TCACCGCATCCAGAAAACGGGCGTAAACCTTACGCCGGA<br>CCACCGTTCCGCCGACCAGACTCTGCATATCTCCGCCAT<br>CCCGGTGACCATACCGTACAGGTTAGAAACCGTCAGCGT<br>GGGGCGCGTACTGGTGCCTTTGCCATTCAAAACC<br>GCTCCCCTGAATGGGATACGGCTGATACTGTGCCCCCTG<br>CCAGGTGACCGGCTCACCTTTTTCGTTCTGCTCATTACAG<br>AAAAAATAACGTTCTCCACCGACCTCTGTCAGGTCGATT<br>TCCCAGAGCACCACGCTGGCCGACTGCTCCGCACGG    |
| 26 | On target  | ATGATGTCTGACGCTGGCATTTCGCATCAAAGGAGAGTGA<br>GATCGGTTTTGTAAAAGATAACGCTTGTGAAAATGCTGA<br>ATTCGCGTCGTCTTACAGCGATGCCAGAGTCTGTAGTG<br>TCAGATGATGACCGTACTCAAACATCGGGTTGAGTATTA<br>TCTTACTGTTTCTTTACATAAACATTGCTGATACCGTTTA<br>GCTGAAACGACATACATTGCAAGGAGTTATAAATGAGT<br>ATCAATGAGTTAGAGTCTGAGCAAAAAGATTGGGCGTTA<br>TCAATGTTGTGCAGATCCGGTGTCTTGTCTCCATGCAGAC<br>ATCACGAAGGTGTTTATGTAGATGAAGGTATAGAT |
| 27 | λ-DNA      | <a href="https://www.ncbi.nlm.nih.gov/nuccore/J02459.1?report=fasta">https://www.ncbi.nlm.nih.gov/nuccore/J02459.1?report=fasta</a>                                                                                                                                                                                                                                                          |

Supp Fig 1

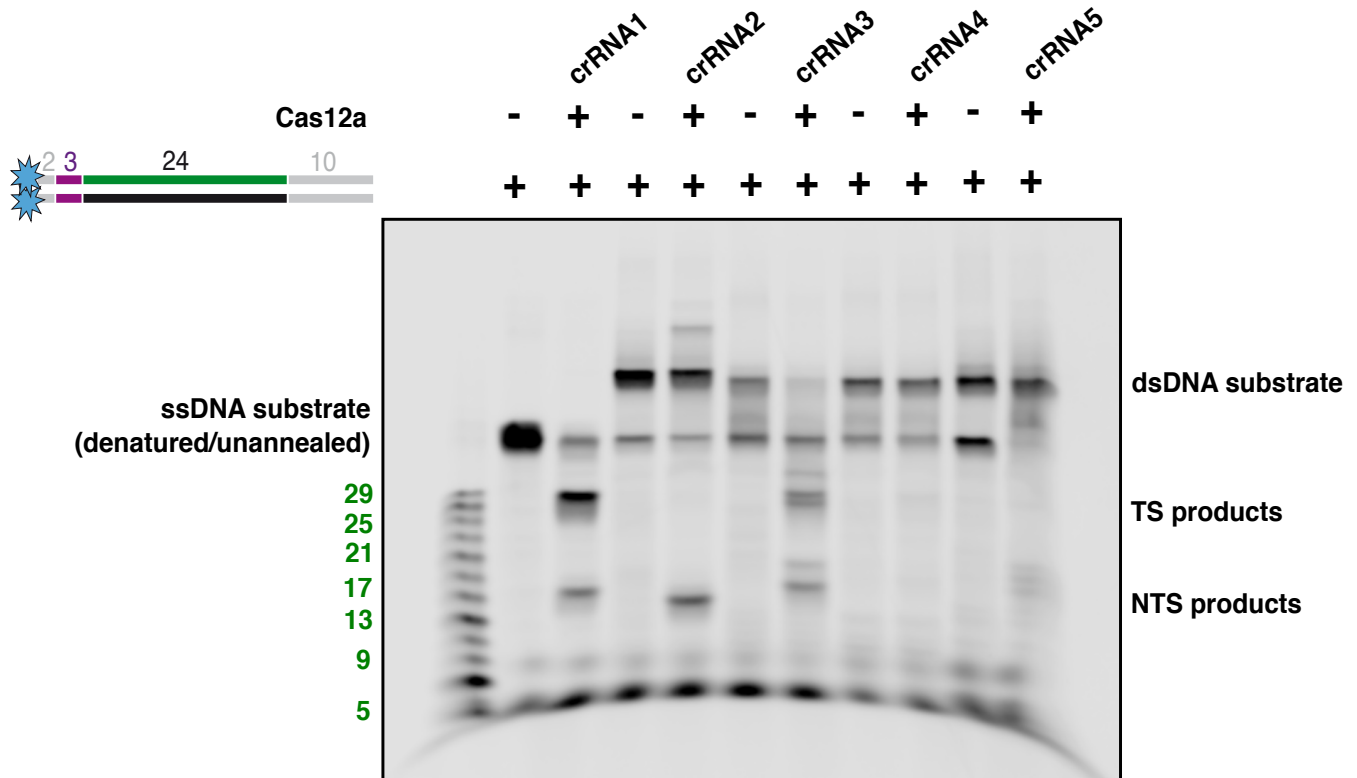

Supp Fig 2

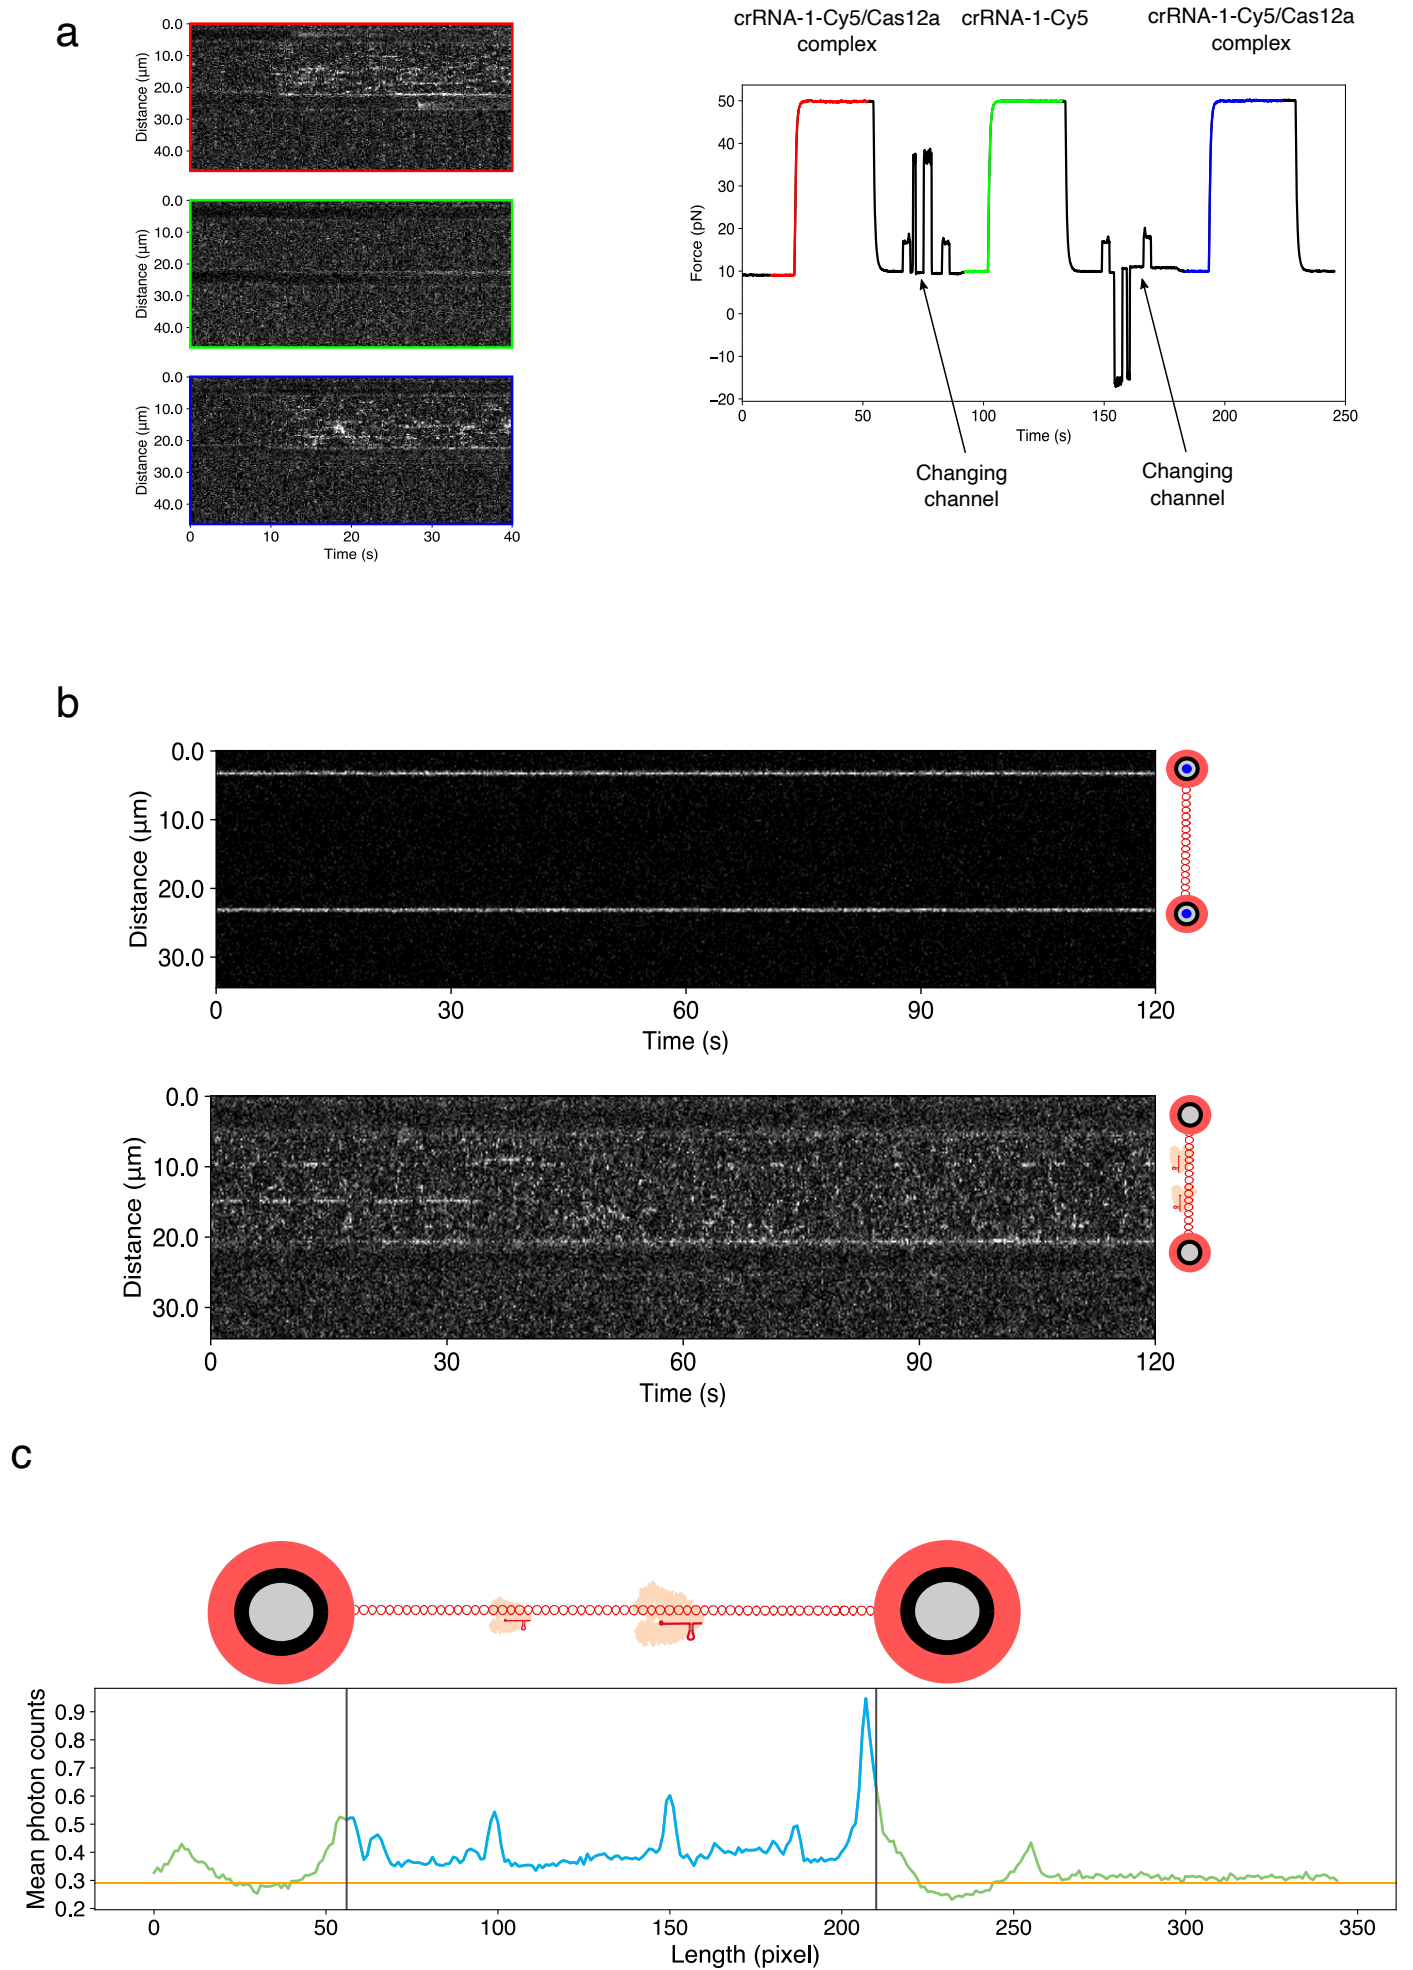

Supp Fig 3

a

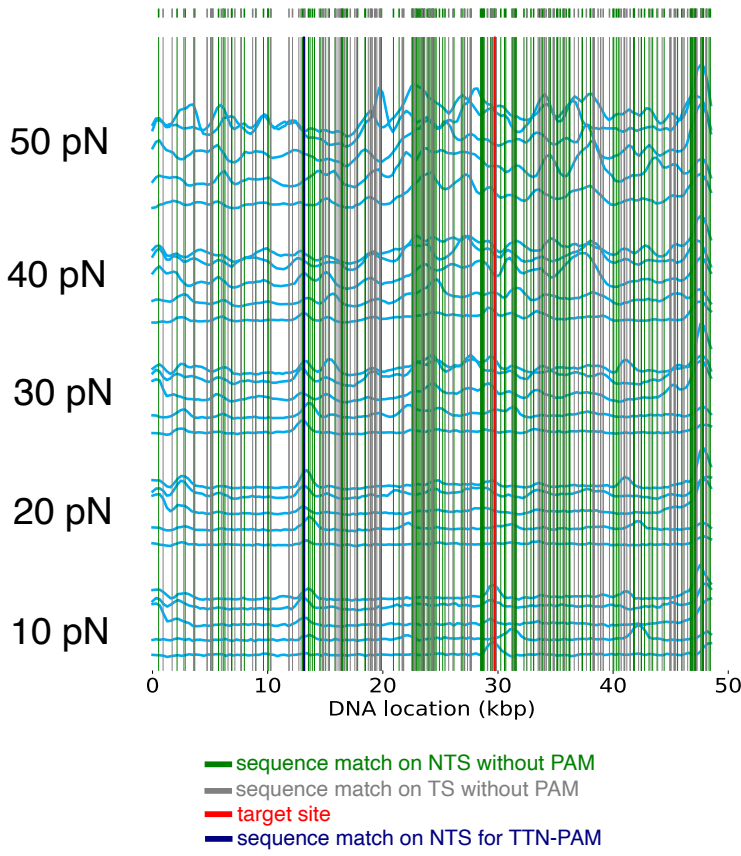

b

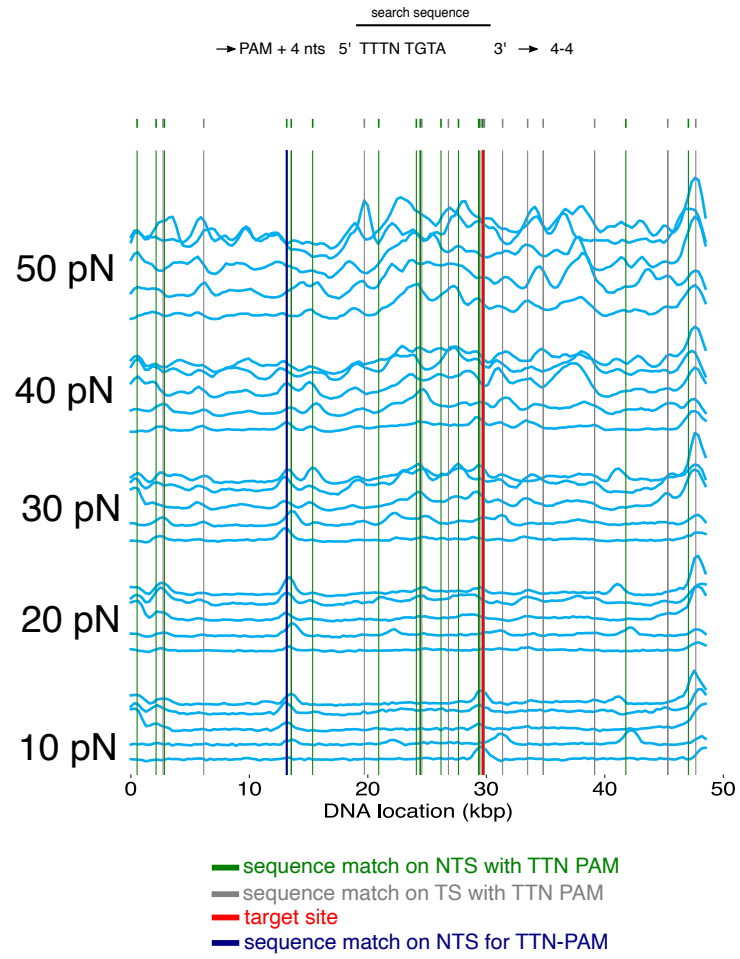

c

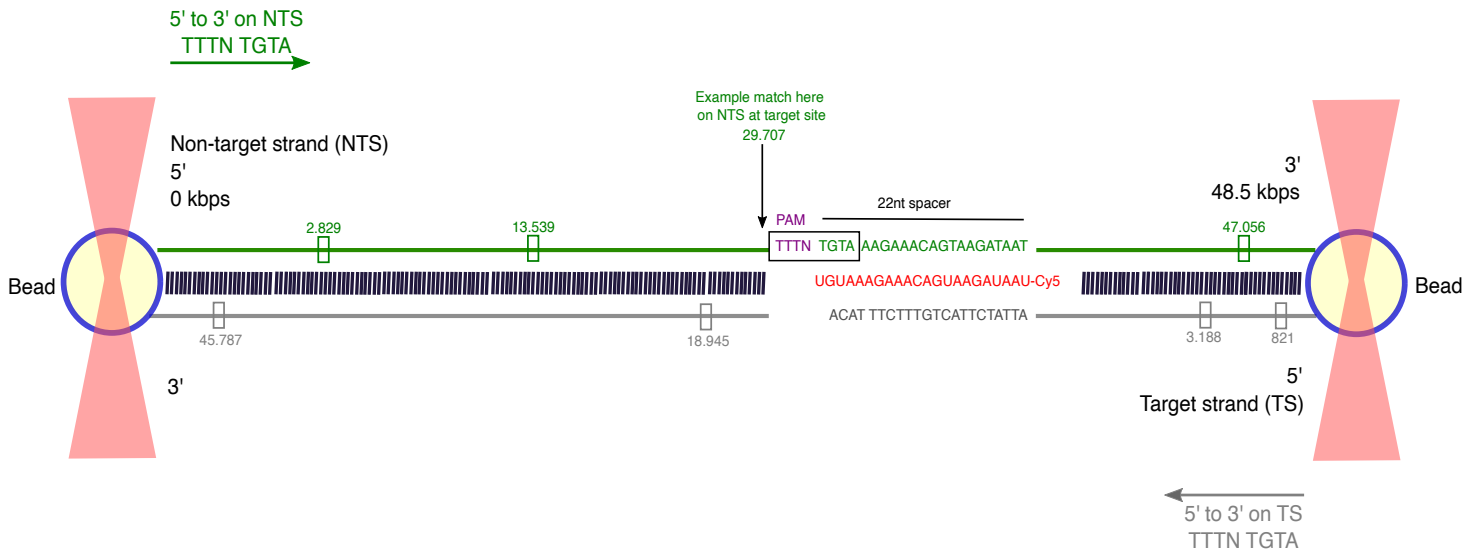

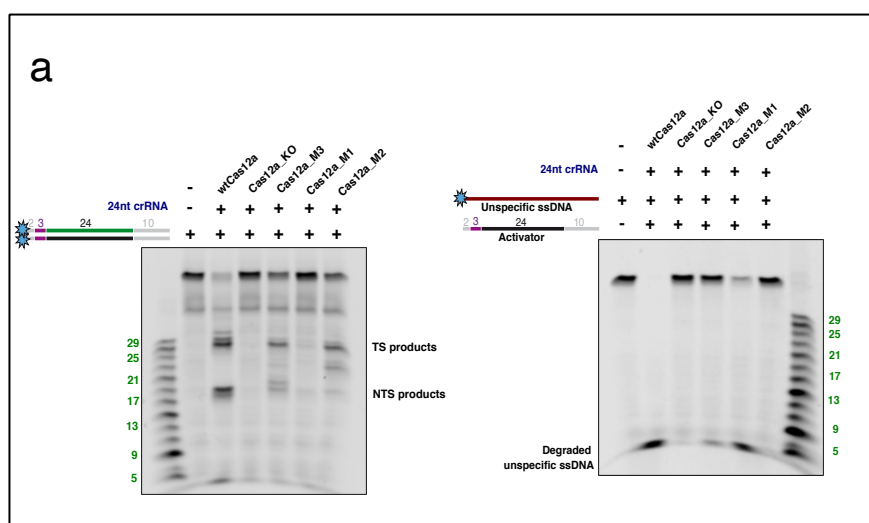

**b**

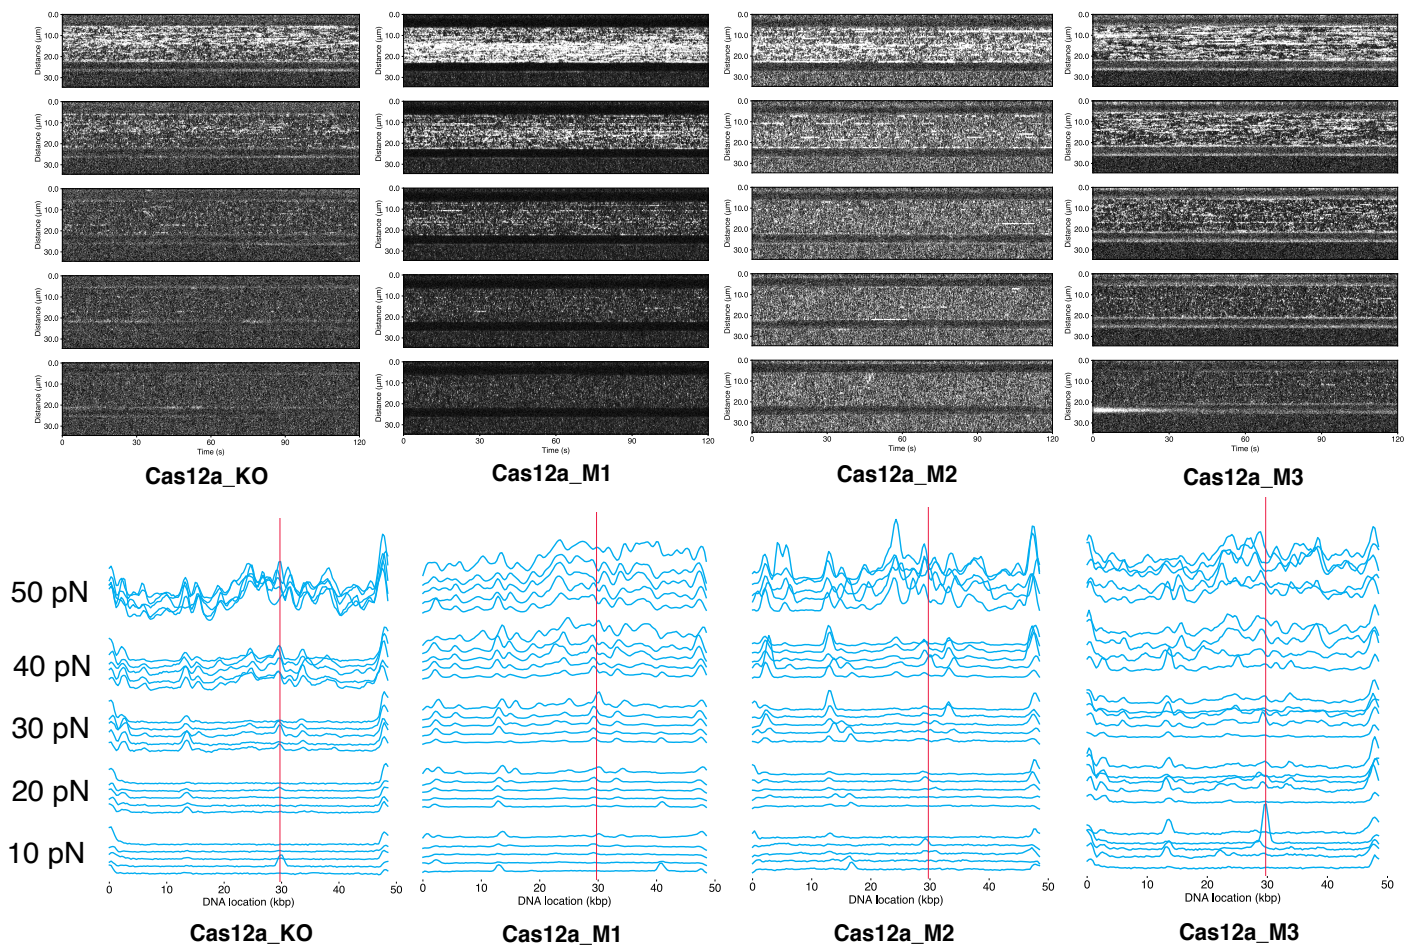

**c**

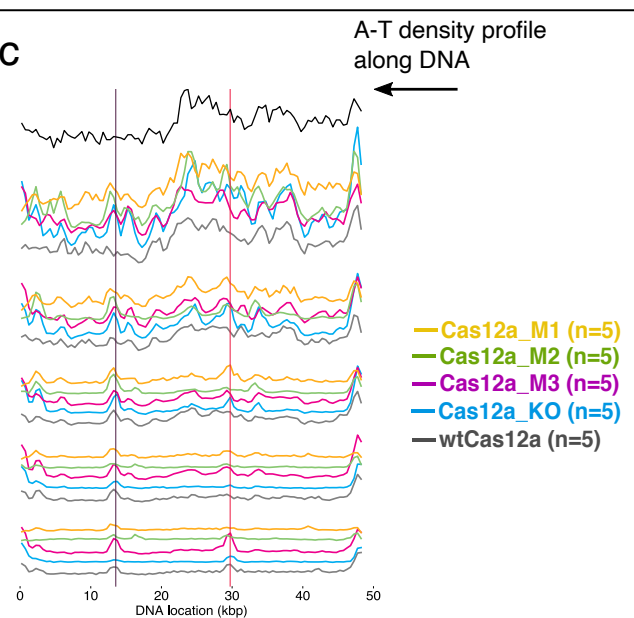

**d**

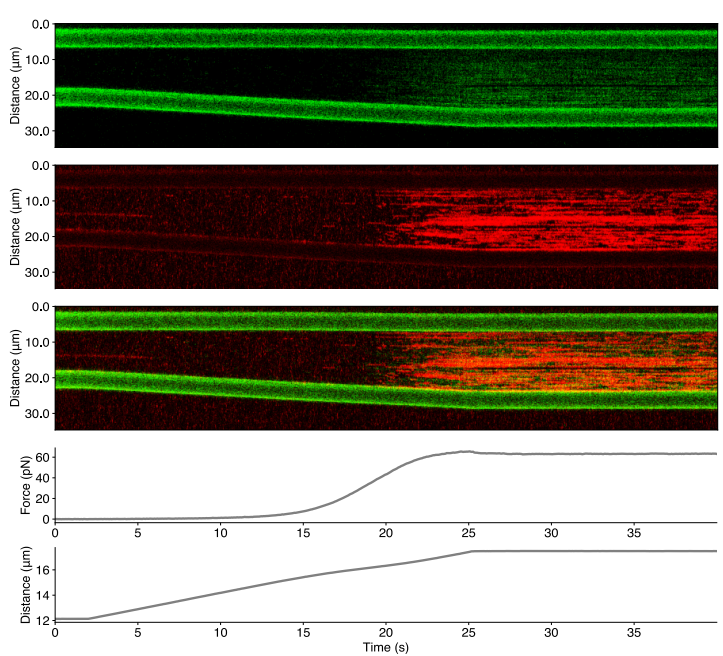



a

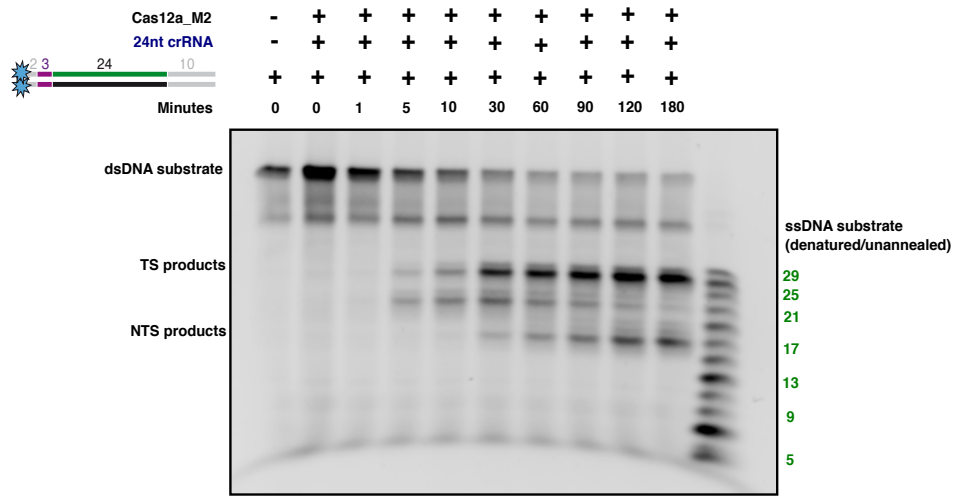

b

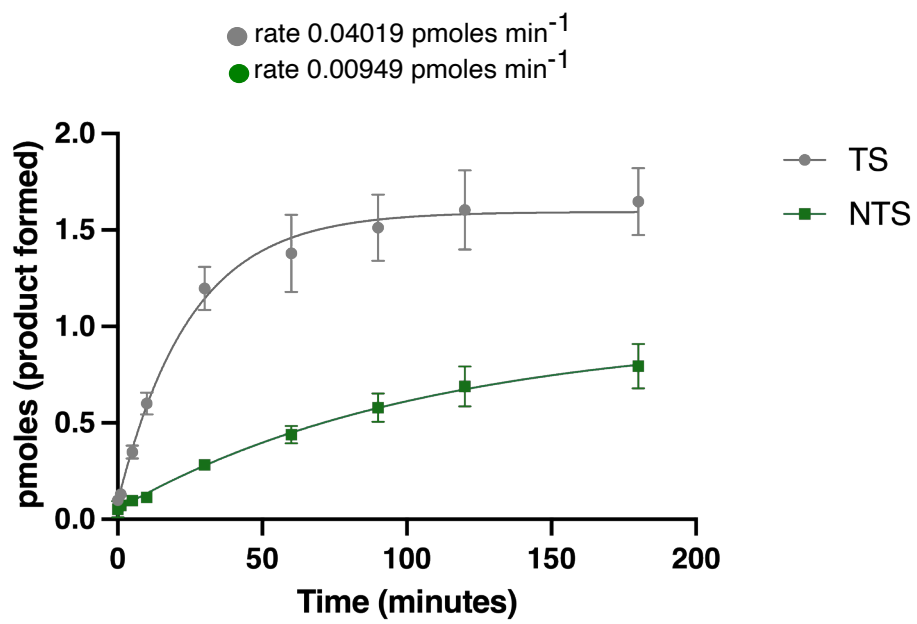

Supplement: gkab1272_supplemental_file.pdf [file gkab1272_supplemental_file.pdf]
